# Supplementary material for: A novel surface modification scheme for ITO nanocrystals by acetylene: a combined experimental and DFT study
Source: Royal Society of Chemistry journal article supplement (doi:10.1039/c5cp05093f), 2015-01-01
Supplement: c5cp05093f1.pdf [file c5cp05093f1.pdf]

# A Novel Surface Modification Scheme for ITO Nanocrystals by Acetylene: A Combined Experimental and DFT Study

*Zhangxian Chen,<sup>a</sup> Yongjie Xi,<sup>a</sup> Liang Huang,<sup>b,c</sup> Wanchao Li,<sup>a</sup> Ran Li,<sup>a</sup> Guoqin Xu,<sup>\*a</sup> and  
Hansong Cheng<sup>\*b</sup>*

<sup>a</sup>Department of Chemistry, National University of Singapore, 3 Science Drive 3,  
Singapore 117543

<sup>b</sup>Sustainable Energy Laboratory, China University of Geosciences Wuhan, 388 Lumo  
Road, Wuhan, China 430074

<sup>c</sup>Department of Chemical and Petroleum Engineering, University of Wyoming, 1000 E  
University Avenue, Laramie, WY, USA 82071

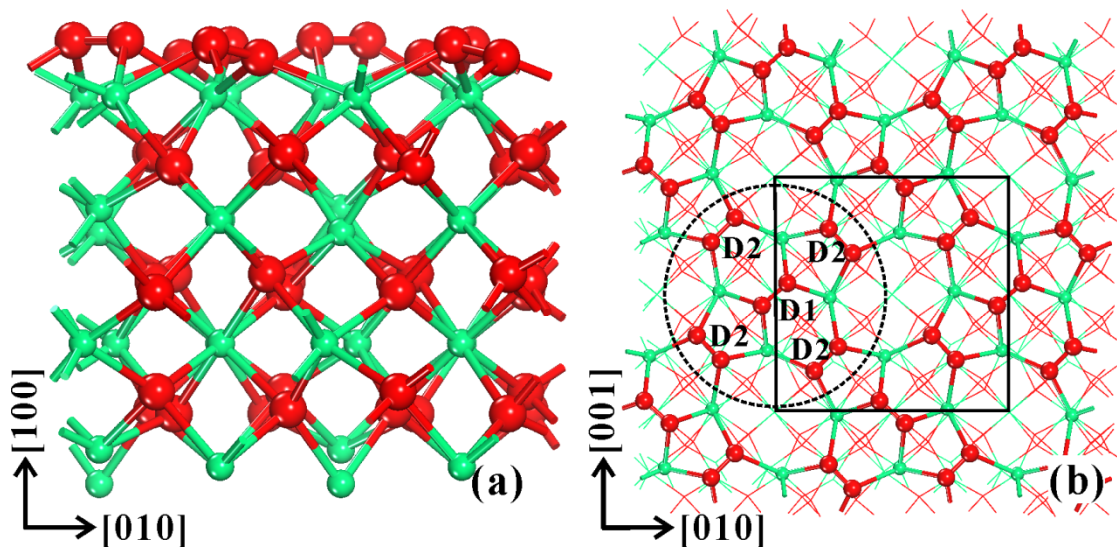

**Figure S1.** The side view (a) and top view (b) of In<sub>2</sub>O<sub>3</sub> (100) surface slab. Color codes: red, O; green, In. The bond lengths of D1 and D2 are 1.475 and 1.506 Å, respectively.

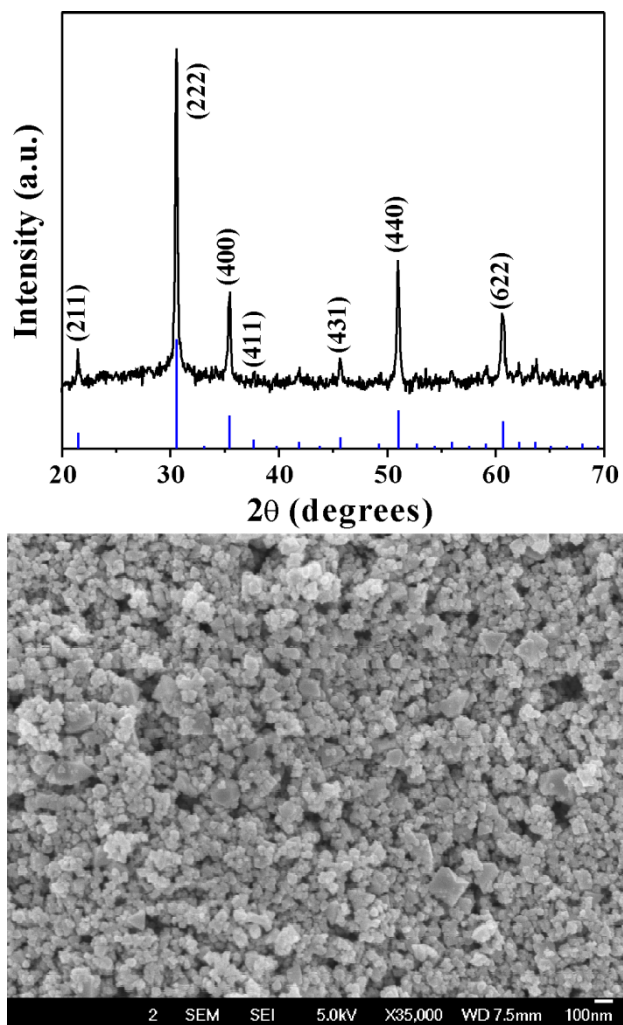

**Figure S2.** X-ray diffraction pattern and scanning electron microscopic image of ITO nanoparticles. Vertical blue lines show the standard pattern of body-centered cubic  $\text{In}_2\text{O}_3$  (ICDD card no.: 06-0416).
